# Supplementary material for: Impact of Vancomycin Treatment and Gut Microbiota on Bile Acid Metabolism and the Development of Non-Alcoholic Steatohepatitis in Mice
Source: MDPI journal article supplement (doi:10.3390/ijms24044050), 2023-02-17
Supplement: s1 [file s1]

**Supplementary Table S1. Antibodies for flow cytometry.**

The antibodies for flow cytometry are listed. The antibodies were purchased from BD Pharmingen (San Diego, CA) or BioLegend (San Diego, CA).

| <b>Antibody</b>  | <b>Clone</b> | <b>Conjugate</b> | <b>Source</b> |
|------------------|--------------|------------------|---------------|
| Anti-CD11c       | HL3          | PE               | BD Pharmingen |
| Anti-CD11b/Mac-1 | M1/70        | APC-Cy7          | BD Pharmingen |
| Anti-CD45        | 30-F11       | APC              | BioLegend     |
| Anti-F4/80       | BM8          | PE               | BioLegend     |
| Anti-F4/80       | BM8          | FITC             | BioLegend     |
| Anti-Ly6C        | HK1.4        | FITC             | BioLegend     |

**Supplementary Table S2. Primers for RT-qPCR.**

The primers were purchased from Applied Biosystems (Waltham, MA).

| Gene          | Gene Symbol | Gene Name                                       | Assay ID      |
|---------------|-------------|-------------------------------------------------|---------------|
| Hprt          | Hprt1       | hypoxanthine guanine phosphoribosyl transferase | Mm00446968_m1 |
| TNF- $\alpha$ | Tnf         | tumor necrosis factor                           | Mm00443258_m1 |
| Il-1 $\beta$  | Il1b        | interleukin 1 beta                              | Mm01336189_m1 |
| Il-6          | Il6         | interleukin 6                                   | Mm00446191_m1 |
| MCP-1         | Ccl2        | chemokine (C-C motif) ligand 2                  | Mm00441243_g1 |
| iNOS          | Nos2        | nitric oxide synthase 2, inducible              | Mm01309898_m1 |
| MPO           | Mpo         | myeloperoxidase                                 | Mm01298424_m1 |
| CCR2          | Ccr2        | chemokine (C-C motif) receptor 2                | Mm99999051_gH |
| F4/80         | Adgre1      | adhesion G protein-coupled receptor E1          | Mm00802530_m1 |
| CD11c         | Itgax       | integrin alpha X                                | Mm00498698_m1 |
| Arg-1         | Arg1        | arginase 1                                      | Mm01190441_g1 |
| MMP-2         | Mmp2        | matrix metalloproteinase 2                      | Mm00439498_m1 |
| Tgfb-1        | Tgfb1       | transforming growth factor, beta 1              | Mm01178820_m1 |
| TIMP-1        | Timp1       | tissue inhibitor of metalloproteinase 1         | Mm00441818_m1 |
| Colla-1       | Colla1      | collagen, type 1, alpha 1                       | Mm00801666_g1 |
| $\alpha$ -SMA | Acta2       | actin, alpha 2, smooth muscle, aorta            | Mm00725412_s1 |
| Desmin        | Des         | desmin                                          | Mm00802455_m1 |
| Fxr           | Nr1h4       | nuclear receptor subfamily 1, group H, member 4 | Mm00436425_m1 |
| TGR5          | Gpbar1      | G protein-coupled bile acid receptor 1          | Mm04212121_s1 |

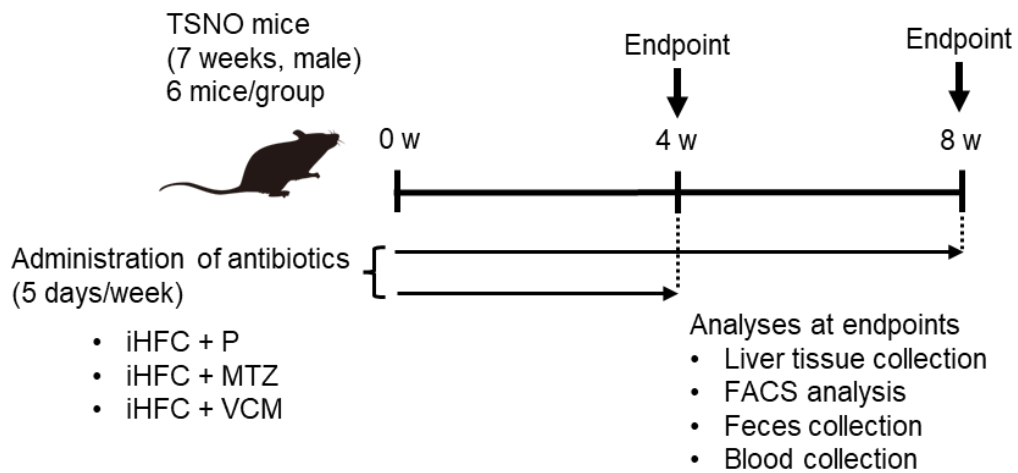

**Supplementary Figure S1. Schematic overview of the study design for antibiotic modification of the gut microbiota using TSNO mice on the iHFC diet.**

Seven-week-old mice were fed with the iHFC diet for 4 or 8 weeks, and simultaneously treated with either placebo (sterilized water) (iHFC + P), metronidazole (iHFC + MTZ) (50 µg/body weight), or vancomycin (iHFC + VCM) (50 µg/body weight) by oral gavage for 5 days a week (6 mice per group). After euthanasia, mice were analyzed as depicted.

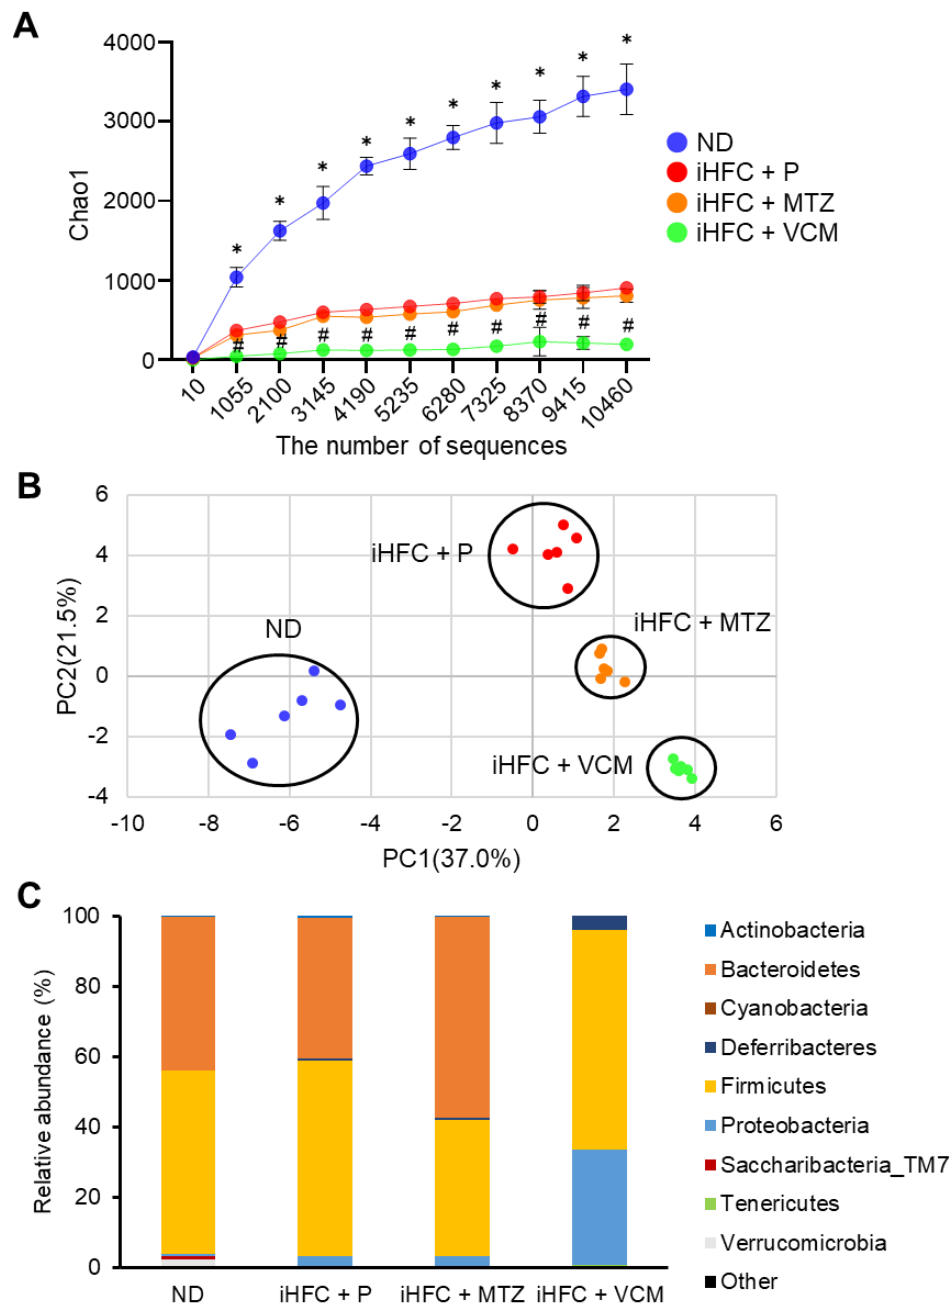

**Supplementary Figure S2. Effect of antibiotic treatment on the gut microbiome in iHFC-fed TSNO mice.**

Fecal samples were collected from ND- or iHFC diet-fed TSNO mice after 4 weeks of placebo or antibiotics treatment. (A) Effect of diet and antibiotics treatment on the  $\alpha$ -diversity (Chao1) of gut bacteria. \* $p < 0.001$  for ND vs iHFC + P, # $p < 0.001$  for iHFC + P vs iHFC + VCM. Statistical significance was evaluated by 2-way ANOVA followed by post-hoc Tukey test. (B) Principal component analysis of  $\beta$ -diversity values. (C) Representation of relative abundance of bacterial phyla in the fecal microbiota of mice from each group (n = 6 per group).

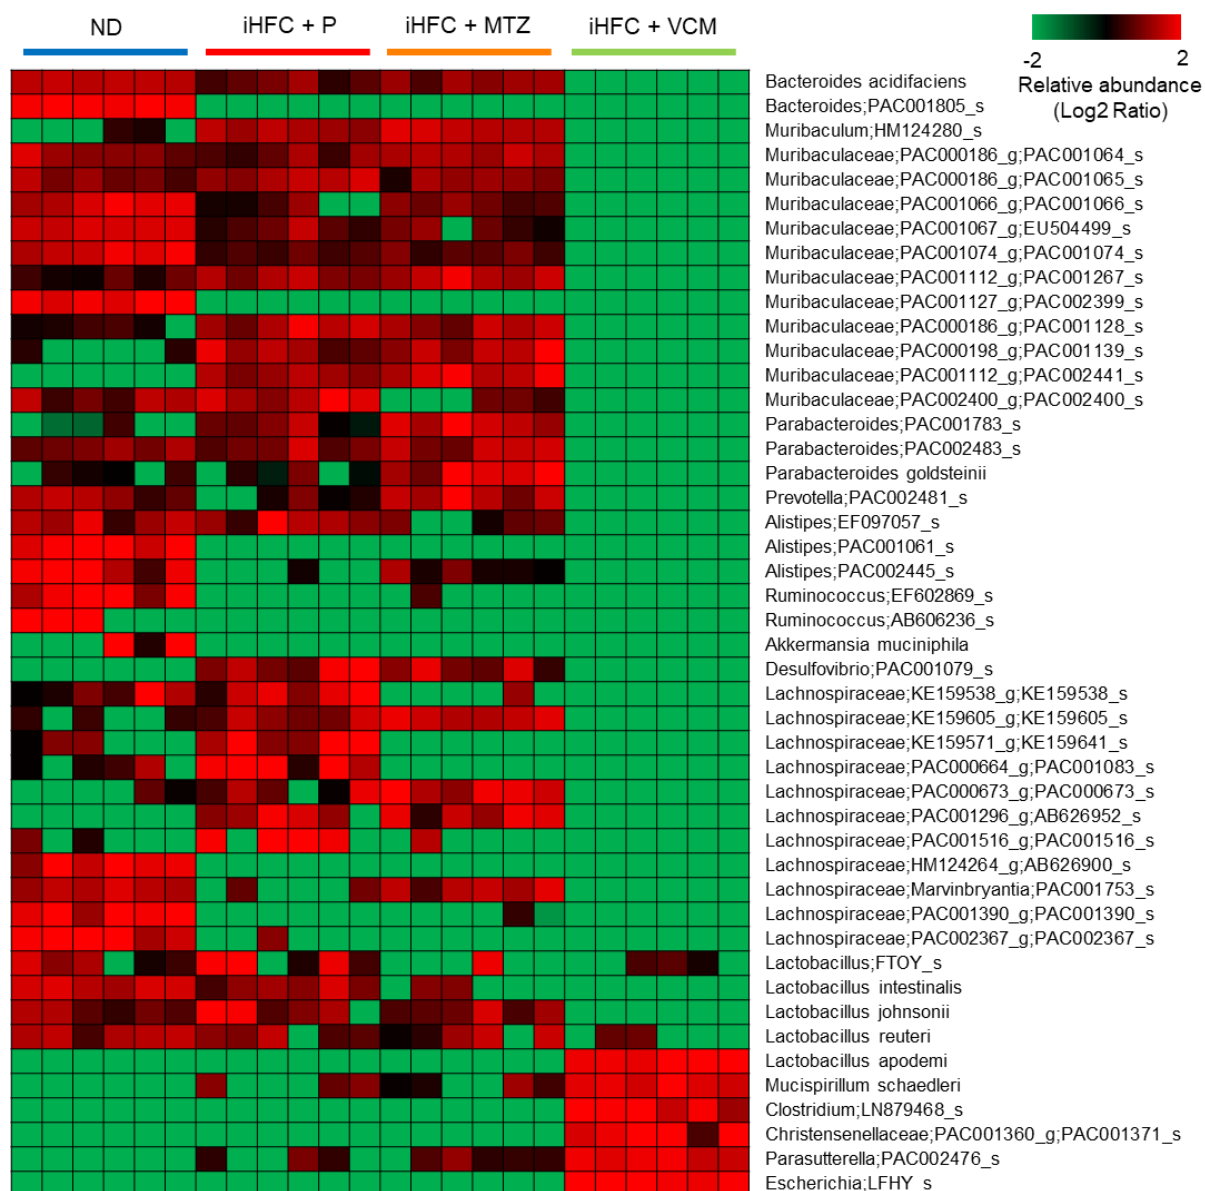

**Supplementary Figure S3. Effect of antibiotic treatment on the gut microbiome in iHFC-fed TSNO mice. Related to Supplementary Figure S2.**

Effect of diet and antibiotic treatment on the abundance of shared bacteria taxa (n = 6 per group). A mean abundance of more than 1% was extracted.

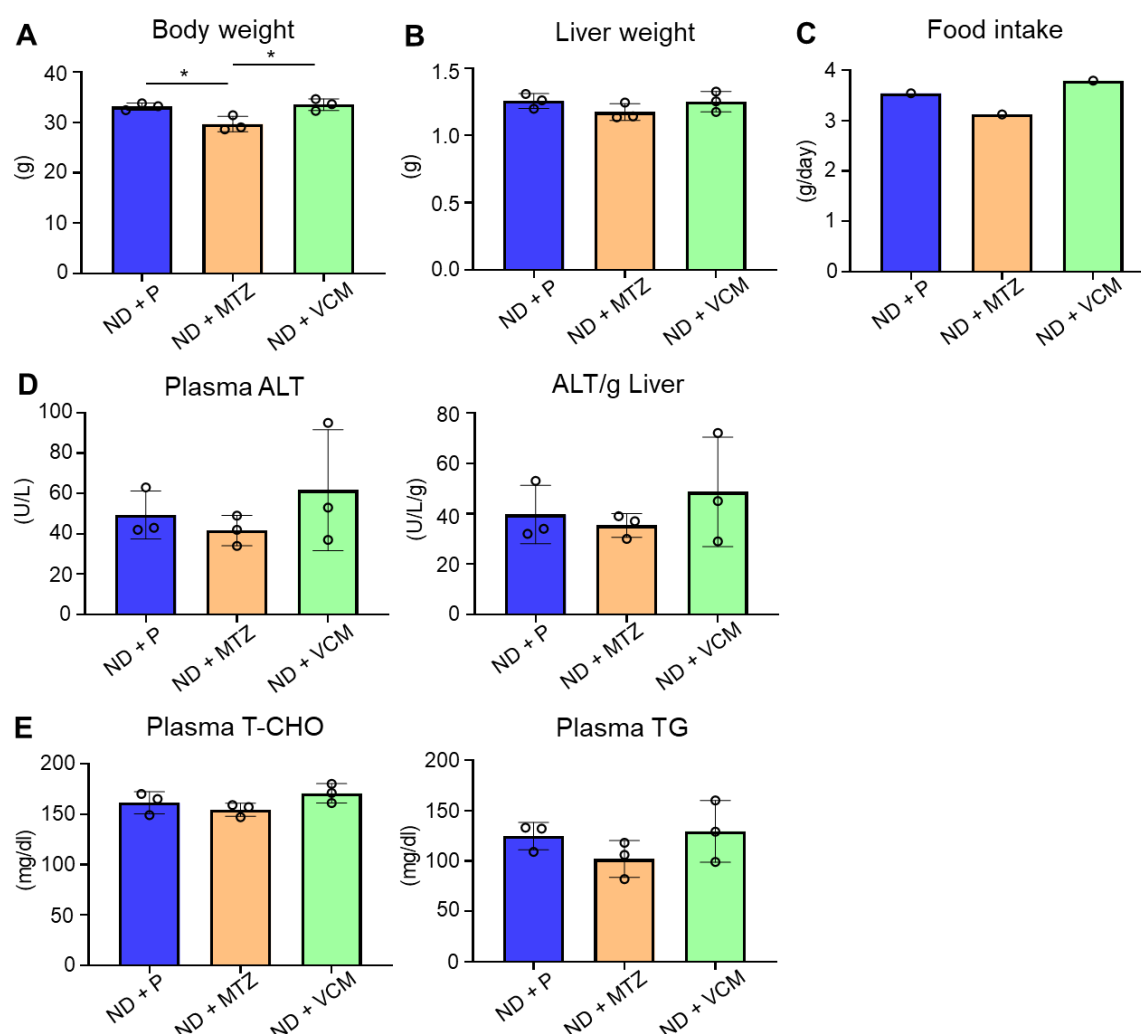

**Supplementary Figure S4. Antibiotic treatment does not affect body weight, liver weight, food intake, and plasma ALT, T-CHO, and TG levels of TSNO mice on the ND diet.**

Seven-week-old male TSNO mice were fed with the ND for 4 weeks and simultaneously treated with either metronidazole (ND + MTZ) (50  $\mu$ g/body weight) or vancomycin (ND + VCM) (50  $\mu$ g/body weight) by oral gavage for 5 days a week ( $n = 3$  per group). (A-C) Body weights, liver weights, and daily food intakes were measured. (D) Plasma ALT levels were measured, and plasma ALT/g liver levels were also calculated. (E) Plasma T-CHO and TG levels were measured. Data are shown as means  $\pm$  SD. \* $p < 0.05$ . Statistical significance was evaluated by 2-way ANOVA followed by post-hoc Tukey test.

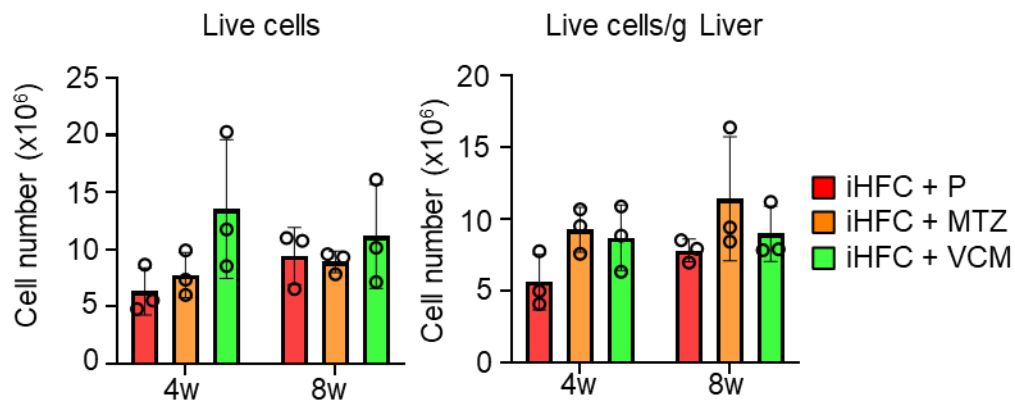

**Supplementary Figure S5. Flow cytometry analysis of non-parenchymal cells in the liver from placebo- or antibiotics-treated TSNO mice.**

Left, cell number of live non-parenchymal cells of the livers from placebo- or antibiotics-treated TSNO mice fed the iHFC diet for the indicated time periods (n = 3 per group). Right, cell number of live non-parenchymal cells per liver weight (g) were also calculated (n = 3 per group). Data are shown as means  $\pm$  SD.

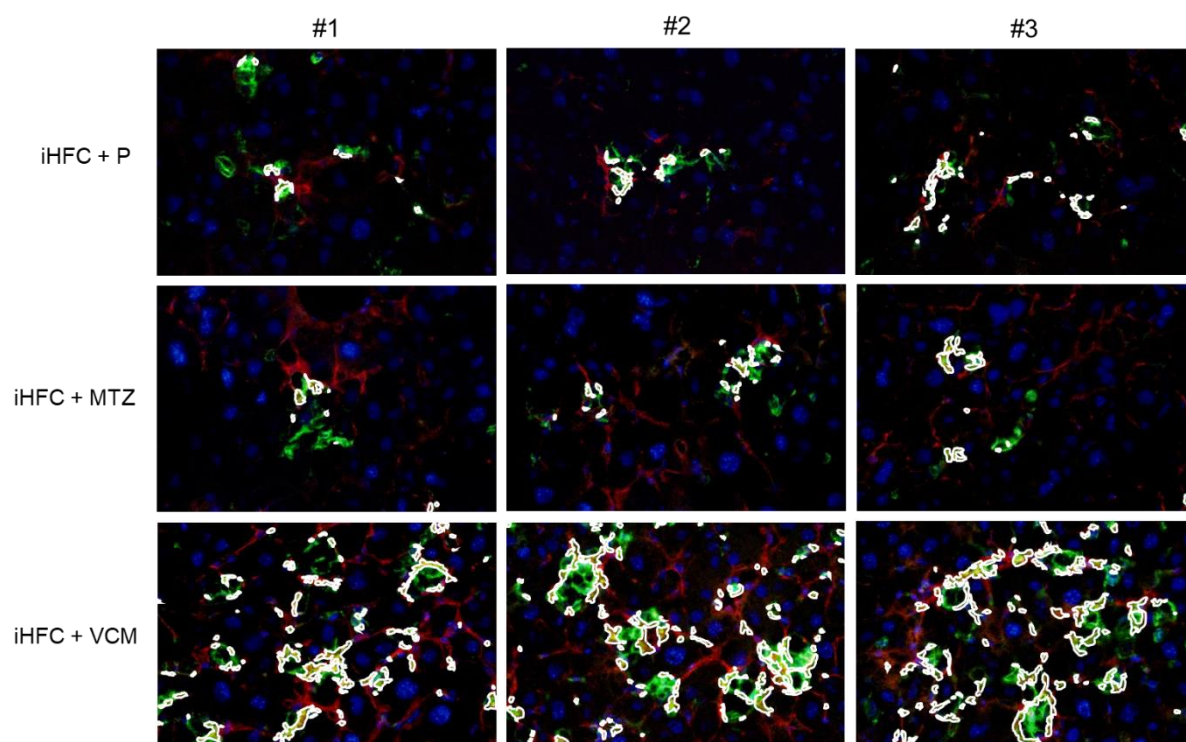

**Supplementary Figure S6. Colocalized areas of CD11c and collagen immunostainings in the liver from TSNO mice.**

Representative histological images (40x magnification) of fluorescent immunohisto-chemistry for CD11c, collagen type 1, and DAPI of the livers from placebo or antibiotics-treated TSNO mice on the iHFC diet for 8 weeks (3 mice/group). The positive signal of each colocalized area was selected according to the method of Tolivia J et al. (ref. 47).



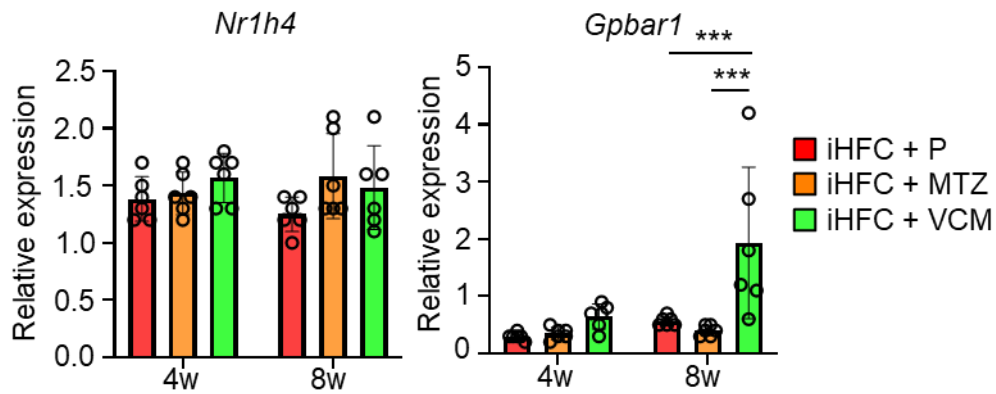

**Supplementary Figure S7. VCM treatment increases the levels of TGR5 gene expression in the liver of iHFC diet-fed TSNO mice.**

RT-qPCR of FXR (*Nr1h4*) and TGR5 (*Gpbar1*) mRNA in the livers from placebo- or antibiotics-treated TSNO mice fed the iHFC diet for the indicated time periods (n = 6 per group). Data are shown as means  $\pm$  SD. \*\*\* $p < 0.001$ . Statistical significance was evaluated by 2-way ANOVA followed by post-hoc Tukey test.

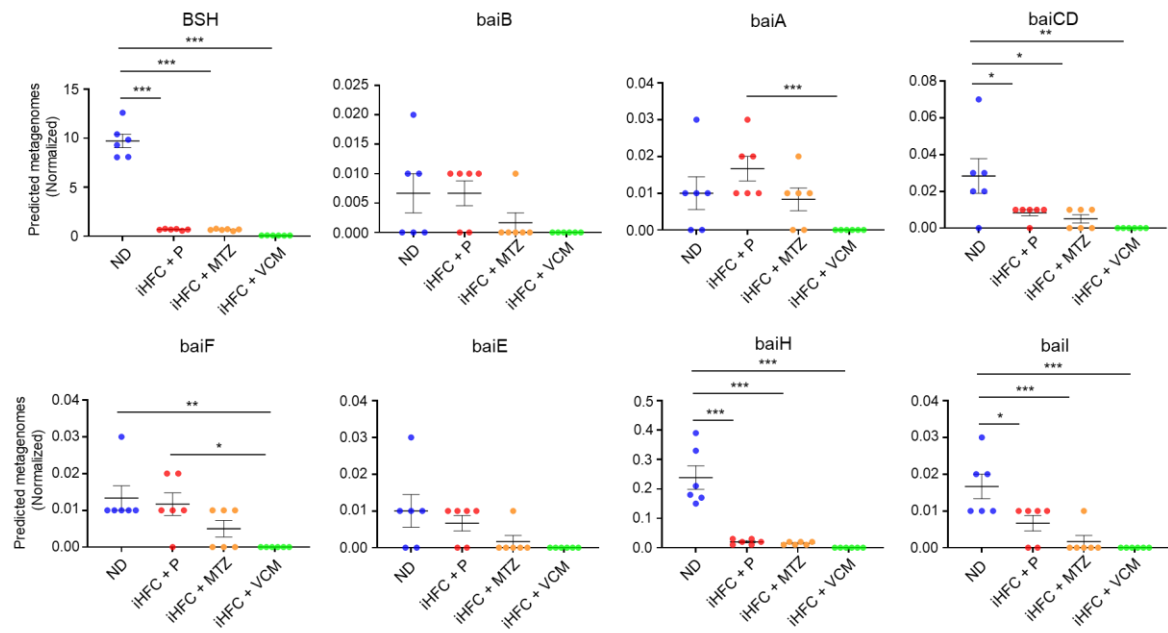

**Supplementary Figure S8. iHFC diet feeding and antibiotic treatment on the iHFC diet markedly reduce the expression levels of bile salt hydrolase (BSH) and various bile-acid 7 $\alpha$ -hydroxylase metagenomes.**

A predictive functional profile analysis (PICRUSt2 analysis) was performed to predict the metagenome expression of BSH and bai genes based on the results of 16S rRNA sequencing analysis (Related to Supplementary Figure 2 and 3). Fecal samples were collected from ND- or iHFC diet-fed TSNO mice after 4 weeks of placebo or antibiotics treatment (n = 6 per group). Data are shown as means  $\pm$  SD. \* $p$  < 0.05, \*\* $p$  < 0.01, \*\*\* $p$  < 0.001. Statistical significance was evaluated by 2-way ANOVA followed by post-hoc Tukey test.
